# Supplementary material for: Cost effective biochar gels with super capabilities for heavy metal removal
Source: Royal Society of Chemistry journal article supplement (doi:10.1039/c6ra10692g), 2016-01-01
Supplement: c6ra10692g1.pdf [file c6ra10692g1.pdf]

*Supporting Information for*

## **Cost effective biochar gels with super capabilities for heavy metal removal**

Pan-pan Chen <sup>a</sup>, Hong-ping Zhang <sup>a,\*</sup>, Huan-de Liu <sup>b</sup>, Xue-gang Luo <sup>a</sup>, Xiao-yan Lin <sup>a</sup>,  
Xiong Lu <sup>c</sup>, Youhong Tang <sup>d,\*</sup>

<sup>a</sup> Engineering Research Center of Biomass Materials, Ministry of Education, School of Materials Science and Engineering, Southwest University of Science and Technology, Mianyang, Sichuan 621010, China

<sup>b</sup> Western Mining Co. Ltd, the key laboratory of mineral processing and comprehensive utilization in the Plateau of Qinghai Province, Xining 810007, Qinhai, China.

<sup>c</sup> Key Laboratory of Advanced Technologies of Materials, Ministry of Education, School of Materials Science and Engineering, Southwest Jiaotong University, Chengdu, Sichuan 610031, China

<sup>d</sup> Centre for NanoScale Science and Technology and School of Computer Science, Engineering and Mathematics, Flinders University, South Australia 5042, Australia

\* Corresponding authors. Tel: +86-816-6089009, Fax: +86-816-6089009, E-mail: [zhp1006@126.com](mailto:zhp1006@126.com) (H. P. Zhang) and Tel: +61-8-82012128, Fax: +61-8-82013618, E-mail: [youhong.tang@flinders.edu.au](mailto:youhong.tang@flinders.edu.au) (Y Tang)

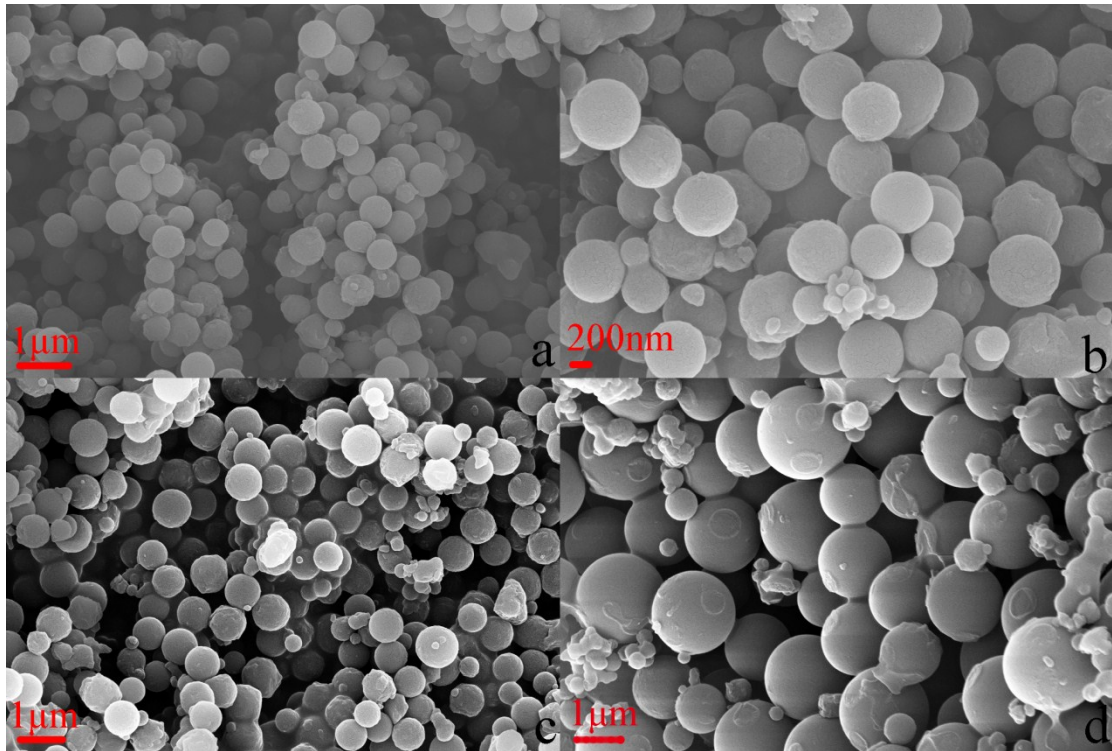

Fig. S1. The SEM images of KGMBs with different sizes

Fig. S1 shows KGMBs with different sizes. They were fabricated by adjusting the KGM and solvent ratio(W/V).The ratios of KGM and solvent in Fig. S1 are (a) 0.6:8, (b) 1.0:8, (c) 1.2:8 and (d) 1.4:8, respectively. The KGMBs show the regular spherical appearance and the KGMB has the smallest size when KGM and solvent ratio is 1.0:8. It exhibits the good dispersibility and possess larger amount of active sites for adsorption.

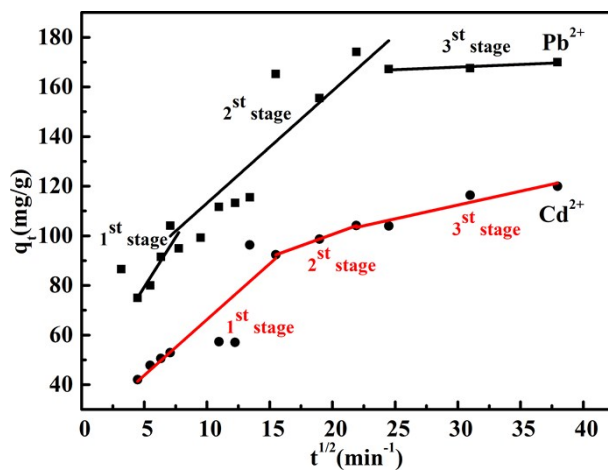

Fig. S2. The intra-particle diffusion model fitting on the relationship between contact time and  $\text{Pb}^{2+}$  and  $\text{Cd}^{2+}$  adsorption capacity onto KGMB.

**Table. S1** The mean diameters of KGMBs prepared with different KGM to solvent ratios.

| KGM: solvent | Mean diameter (nm) |
|--------------|--------------------|
| 0.6:8        | 615.7              |
| 1.0:8        | 512.4              |
| 1.2:8        | 675.5              |
| 1.4:8        | 869.3              |

Table. S1 shows the mean diameter of KGMBs at the different synthesis KGM to solvent ratios. Under the ratio of 1.0:8, the KGMB owns the smallest size which could be beneficial to remove of  $\text{Pb}^{2+}$  and  $\text{Cd}^{2+}$ .
